1 **Title:**

2 Barriers and incentives for conducting research amongst the Ophthalmologists in

3 Sub- Saharan Africa

4 **Authors:** Kazim A Dhalla<sup>1,2\*</sup> , Micheal Guirguis<sup>3</sup>

5 \*corresponding author

6 E mail: [kazimdhalla@hotmail.com](mailto:kazimdhalla@hotmail.com) ( KD)

7 **Affiliations:**

8 1. Consultant Ophthalmologist, Dr. Agarwal's Eye Hospital- Tanzania

9 2. Ex- Consultant Ophthalmologist, CCBRT Hospital, Dar Es Salaam,

10 Tanzania

11 3. University of Liverpool – Online Program

12 **Abstract**

13 **Background**

14 Research is a critical component amongst the strategies to improve health

15 outcomes of any country. The role of research assumes greater importance in

16 Africa as it carries a larger share of global burden of diseases, blindness and low  
17 vision. “Vision 2020- the Right to Sight” is a WHO-IAPB collaborated initiative  
18 aiming to eliminate preventable blindness by the year 2020. High quality research  
19 in eye care is imperative for the initiative to succeed, however, there is a dearth of  
20 research in eye care in sub Saharan Africa in general and specifically in the  
21 Eastern, Central and Southern African (ECSA) region. Identifying the barriers that  
22 hamper research in this region is an important step towards elimination of  
23 preventable blindness.

## 24 **Methods**

25 A structured questionnaire using the SurveyMonkey program was sent to  
26 ophthalmologists in the ECSA region and South Africa through their respective  
27 regional professional bodies. Data was analyzed using the SPSS program version.

## 28 **Results**

29 Lack of funding, inadequate time and poor research knowledge were the main  
30 research barriers while ability to improve eye health care through research was the  
31 main incentive for conducting research.

## 32 **Conclusion**

33 The barriers mainly center on financial, human and administrative infrastructure  
34 and resources. In spite of the barriers, ophthalmologists in the study region are  
35 enthusiastic in research aiming to increase evidence based knowledge to improve  
36 eye health care in line with the goals of “Vision 2020- the Right to Sight”  
37 initiative.

38 **Key words:** Research productivity, barriers, incentives, vision 2020.

39 Abstract word count: 233

## 40 **Introduction**

41 Africa carries a large burden of global blindness and visual impairment. By the  
42 WHO estimates, 60% of the world’s blind live in Sub Saharan Africa, India and  
43 China. In 1999, WHO in partnership with International Agency for the Prevention  
44 of Blindness (IAPB) launched a global initiative called “Vision 2020- the Right to  
45 Sight” targeting to eliminate avoidable blindness, which is preventable in 80% of  
46 the cases, by the year 2020. (<http://www.who.int/mediacentre/factsheets>. Research  
47 would therefore be an integral part of this initiative if it were to achieve its goals.  
48 Though India and China are thriving in ophthalmic research (1), Africa is lagging  
49 behind to a large extent (2) with obvious paucity of scientific literature from Sub

50 Saharan Africa in the major medical databases (3). Why is there low research  
51 productivity in Sub Saharan Africa? If barriers for conducting ophthalmic research  
52 exist, with the exception of West Africa, they are unknown for a large part of Sub  
53 Saharan Africa. This study explores the barriers and incentives for conducting  
54 research amongst the ophthalmologists in Sub Saharan Africa with specific focus  
55 on ophthalmologists in the Eastern, Central and Southern African countries  
56 (ECSA) and South Africa.

57 **Aim:**

58 To identify factors that act as barriers for conducting research and factors that  
59 encourage research activities amongst the Ophthalmologists in the ECSA region  
60 and South Africa.

61 **Methodology:**

62 Cross sectional survey of Ophthalmologists in the ECSA region (which is formed  
63 by the following countries; Tanzania, Kenya, Uganda, Rwanda, Burundi,  
64 Democratic Republic of Congo (DRC), Ethiopia, South Sudan, Zambia, Malawi,  
65 Botswana, Mozambique, Somalia and Lesotho) and South Africa (SA) . West  
66 Africa was excluded from the study because a similar study was conducted in the  
67 region in 2011 (4)

68 **Study design**

69 Cross sectional survey study

70 **Inclusion criteria**

71 All ophthalmologists in the ECSA region and SA irrespective of ethnicity and  
72 whether in clinical practice, research, administration or retired.

73 **Exclusion criteria**

74 African ophthalmologists originally from the study region but currently residing  
75 out of the study region.

76 **Sample size**

77 The study region is estimated to have about 622 Ophthalmologists and distributed  
78 as shown in “Table 1”:

79 **Table 1: Distribution of Ophthalmologists in the study region**

| COUNTRY  | OPHTHALMOLOGISTS |
|----------|------------------|
| Tanzania | 34               |
| Kenya    | 86               |

|              |     |
|--------------|-----|
| Uganda       | 40  |
| Ethiopia     | 107 |
| Malawi       | 8   |
| Zambia       | 18  |
| Rwanda       | 13  |
| Burundi      | 16  |
| DRC          | 67  |
| South Africa | 233 |
| Total        | 622 |

80 (www. icoph.org. 2012 and (5)

81 Assuming 20% of the participants (124) are not reachable and response rate of

82 60%, the sample size was calculated to be 300 as follows :

83  $622 - 124 = 498 \times 60\% = 298.8$  rounded to 300.

84 However, the target was to register all the ophthalmologists hence census sample

85 was extracted.

## 86 **Survey tool**

87 A structured questionnaire was used to collect data from the participants using the  
88 online SurveyMonkey ® program ([www.surveymonkey.com](http://www.surveymonkey.com)). Some questions were  
89 adapted ,with the author’s permission, from a similar study done in Nigeria, West  
90 Africa (Mahmoud, A. et al 2011). The full questionnaire is accessible from  
91 [https://www.surveymonkey.com/r/Eye\\_Research](https://www.surveymonkey.com/r/Eye_Research)

## 92 **Pilot testing**

93 A URL linked questionnaire was sent to 10 Ophthalmologists outside the study  
94 area and were requested to participate in the pilot study. All respondents found the  
95 questionnaire easy to fill and took less than ten minutes to complete. All but one  
96 thought that the questions were relevant to the objectives.

## 97 **Ethical issues**

98 The study is extracted from a dissertation for a Master of Science degree (M.Sc) in  
99 clinical research with University of Liverpool (online course). Ethical clearance for  
100 the study was granted by the University of Liverpool ethics committee after  
101 obtaining permission to conduct the research in the study area from the regional  
102 ophthalmological bodies; College of Ophthalmology of Eastern, Central and  
103 Southern Africa (COECSA) and Ophthalmological Society of Southern Africa  
104 (OSSA) respectively.

## 105 **Participant recruitment procedure**

106 The COECSA secretariat office sent out electronic mails with the URL link of the  
107 questionnaire to all the members. The study was also advertised on OSSA's web  
108 based monthly newsletter circulated by electronic mail to all the members.  
109 Subsequently, 3 follow up reminders were sent to the members requesting them to  
110 participate in the study. Additionally, personal mails with two follow up reminders  
111 were sent to chairpersons of individual countries' ophthalmological societies  
112 requesting them to encourage their members to participate. Participant recruitment  
113 started on 1<sup>st</sup> April 2016 and access to the questionnaire was closed on the 20<sup>th</sup> of  
114 May 2016. It was however not possible to know how many ophthalmologists  
115 actually got the information.

116 Consent was taken by asking participants to "tick" the consent box in the  
117 questionnaire if they agreed to participate. Furthermore, the action of filling the  
118 questionnaire itself was taken as surrogate for consent. Participant Information  
119 Sheet (PIS) was included in the online questionnaire which specified that  
120 participation was voluntary with the option of not answering personal questions  
121 like name, age and/or gender. Access to database was restricted to the researchers  
122 only thus ensuring complete confidentiality of the participants' information.



## 123 **Data entry process**

124 All responses were stored in the SurveyMonkey® program and directly  
125 downloaded to the statistical package, SPSS® version 21 ( IBM ®SPSS®Statistic)  
126 in the coded form.

## 127 **Data cleaning and analysis:**

128 Data cleaning was done by running a frequency distribution of all the variables. A  
129 few respondents preferred not to mention their names, age and/ or gender.

130 Questionnaires without the demographic data were included in the analysis as this  
131 would not affect the overall results.

132 Research productivity, defined as the number of research papers published in the  
133 10 year period from 1<sup>st</sup> January 2005 to 31<sup>st</sup> December 2014, was the dependent  
134 variable. Independent variables included age, gender, number of years in practice,  
135 type of institution i.e. government, non-government or private, post held i.e.  
136 Clinical, academic, both clinical and academic or purely administrative; time spent  
137 in private practice, additional post graduate training in research and pre-defined  
138 research barriers. Descriptive statistic was done using the frequency distribution  
139 and measure of central tendency appropriate for the data.

140 Inferential statistics was done using chi-square test for the 2 by 2 nominal variables  
141 and Somer's delta ( Somer's d ) test for the ordinal variables. Poisson regression

142 analysis was done to determine statistical association between the dependent and  
143 independent variables. A p value of <0.05 was taken to be statistically significant.

## 144 **Results**

### 145 **Survey response**

146 There were a total of 114 respondents from the region. The response rate was  
147 therefore 38% assuming that survey questionnaire reached all the 300 potential  
148 participants. Country wise distribution of the respondents is given in “Table 2”.

149 **Table 2: Distribution of respondents by study region**

| COUNTRY  | N  | %   |
|----------|----|-----|
| Tanzania | 25 | 22  |
| Kenya    | 47 | 41  |
| Uganda   | 8  | 7   |
| Ethiopia | 7  | 6   |
| Rwanda   | 3  | 2.6 |
| DRC      | 1  | 0.9 |

|              |     |      |
|--------------|-----|------|
| Somalia      | 1   | 0.9  |
| Botswana     | 1   | 0.9  |
| Mozambique   | 1   | 0.9  |
| Zambia       | 2   | 1.8  |
| Malawi       | 3   | 2.6  |
| Lesotho      | 1   | 0.9  |
| South Africa | 14  | 12.3 |
| Total        | 114 | 99.8 |

150

151 Majority of the respondents, 87.7%, were from the ECSA region.

152 **Socio- Demographic description of the population**

153 **Table 3: Socio-Demographic description**

| VARIABLE                  | n    | % |
|---------------------------|------|---|
| <b>Age ( years) N=106</b> |      |   |
| Mean                      | 43.8 |   |

|                                   |       |      |
|-----------------------------------|-------|------|
| Median                            | 42.0  |      |
| Range                             | 30-64 |      |
| Age group( years)                 |       |      |
| 30-40                             | 47    | 44.3 |
| 41-55                             | 49    | 46.2 |
| >55                               | 10    | 9.4  |
| Gender N=114                      |       |      |
| Male                              | 72    | 63   |
| Female                            | 42    | 37   |
| Number of years in Practice N=114 |       |      |
| Mean                              | 10.4  |      |
| Median                            | 9.0   |      |
| Range                             | 1-34  |      |
| 1-5                               | 36    | 31.6 |
| 6-10                              | 29    | 25.4 |

|                                   |    |      |
|-----------------------------------|----|------|
| 11-15                             | 25 | 21.9 |
| >15                               | 24 | 21.1 |
| Job description N=114             |    |      |
| Clinical only                     | 29 | 25.4 |
| Clinical and academic             | 79 | 69.3 |
| Administrative only               | 5  | 4.4  |
| Retired                           | 1  | 0.9  |
| Additional administrative role    | 8  | 7.0  |
| Work set up N=114                 |    |      |
| Governmental organization         | 72 | 63.2 |
| Non- governmental organization    | 12 | 10.5 |
| Faith based organization          | 18 | 15.8 |
| Private organization              | 12 | 10.5 |
| Private practice engagement N=114 |    |      |
| None                              | 46 | 40.4 |

|           |    |      |
|-----------|----|------|
| Part time | 58 | 50.9 |
| Full time | 10 | 8.8  |

154

155 A third of the respondents were in their early careers ( 1-5 years) in  
156 Ophthalmology and 19.3% were fresh graduates. Majority of the clinicians(69.3%)  
157 were also involved in academic practice either as university lecturers or teaching  
158 younger cadres including residents on attachment and cataract surgeons. 56  
159 participants (49.12%) were practicing at only one place and that includes those  
160 who are fully engaged in their own private practice. The remaining 58 (50.87%)  
161 had full time placement as well as engaging in private practice.

## 162 **Academic and research profile**

163 Respondents' academic and research profiles and areas of research interest are  
164 given in "Table 4" and "Table 5".

165

166

167

168

169 **Table 4: Academic and research profiles**

| PARAMETER                                                     | n   | %     |
|---------------------------------------------------------------|-----|-------|
| No. of Scientific papers published in the past 10 years N=114 |     |       |
| 0                                                             | 38  | 33    |
| 1-5                                                           | 49  | 43    |
| 6-10                                                          | 17  | 14.91 |
| >10                                                           | 10  | 8.77  |
| Currently involved in research N=114                          |     |       |
| Yes                                                           | 66  | 58    |
| No                                                            | 48  | 42    |
| Interested in research N=114                                  |     |       |
| Yes                                                           | 108 | 94.7  |
| No                                                            | 6   | 5.3   |
| Possession of research degree N=114                           |     |       |

|                                         |    |       |
|-----------------------------------------|----|-------|
| Yes                                     | 18 | 15.8  |
| No                                      | 96 | 84.2  |
| Type of degree ( Highest achieved) N=18 |    |       |
| PhD                                     | 2  | 11.11 |
| MSc in Community eye health             | 6  | 33.33 |
| MPH                                     | 5  | 27.77 |
| MSc in Biostatistics/ Epidemiology      | 3  | 16.66 |

170

171 A third of the respondents did not have any scientific publication in the past 10  
172 years and 19 (16.7%) had only 1 publication. Number of papers published was  
173 statistically significantly related to the participant's age ( $p=0.000$ ) and number of  
174 years in practice ( $p=0.000$ ), however, Spearman correlation coefficient was not  
175 very strong in both the cases; Age  $\rho=0.437$  and years in practice  $\rho=0.5$ . There was  
176 no statistically significant association between the number of papers published and  
177 possession of a research degree ( $p=0.077$ ). 6 participants ( 5.2%) published at  
178 least 20 papers, all of whom had research degrees. One participant with PhD  
179 published 40 papers.



180 **Table 5: Broad areas of research interest**

| Area of research                     | N  | %    |
|--------------------------------------|----|------|
| Retina                               | 26 | 23.4 |
| Cataract                             | 23 | 20.7 |
| Glaucoma                             | 15 | 13.5 |
| Pediatric Ophthalmology              | 15 | 13.5 |
| Cornea                               | 9  | 8.1  |
| Oculoplasty                          | 7  | 6.3  |
| Community Ophthalmology/Epidemiology | 5  | 4.5  |
| Ocular malignancy                    | 2  | 1.8  |
| Uveitis                              | 2  | 1.8  |
| Conjunctival diseases                | 2  | 1.8  |
| Administrative                       | 1  | 0.9  |
| Neglected Tropical diseases          | 1  | 0.9  |
| Refractive errors                    | 1  | 0.9  |

181

|                      |   |     |
|----------------------|---|-----|
| Nutritional diseases | 1 | 0.9 |
| Trachoma             | 1 | 0.9 |

182

183 Retinal diseases had the highest research interest followed by cataract, glaucoma  
184 and pediatric ophthalmology. Though 14 participants had research degrees in  
185 community health and epidemiology, only 5 had interest in the field. It is  
186 interesting to note that only 1 respondent was interested in trachoma.

## 187 **Research barriers**

188 The majority of respondents, 101/110 (91.8%), felt there were significant barriers  
189 for conducting ophthalmic research in Sub Saharan Africa. Figure 1 shows the  
190 frequency distribution of the barriers mentioned by the respondents.

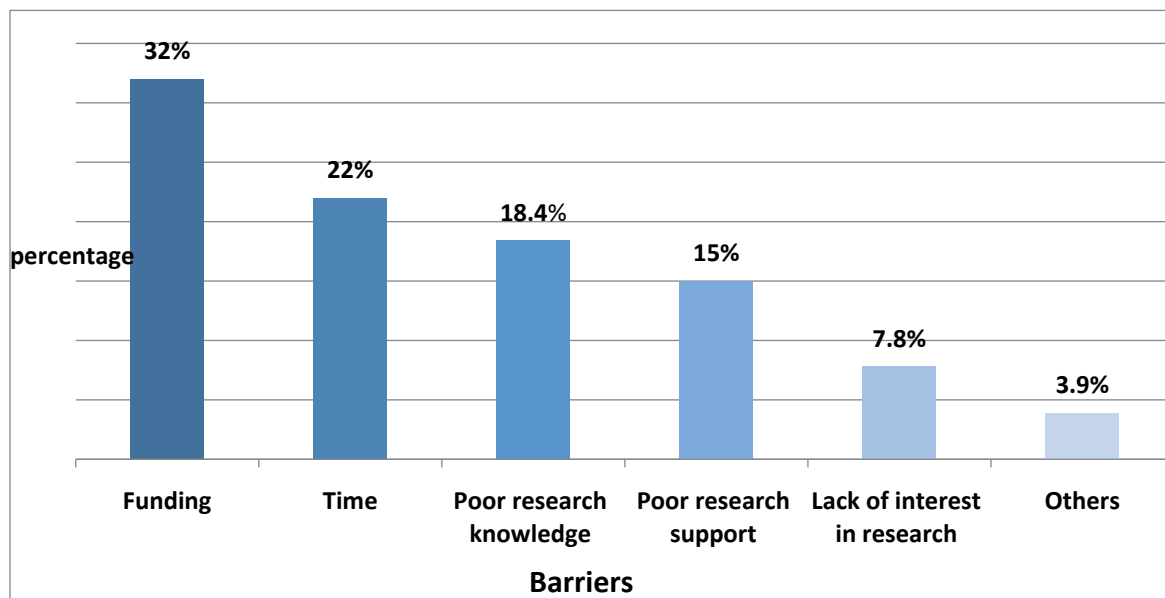

191

192 **Figure 1 : Research barriers**

193 **Funding**

194 Majority of the respondents, 60 (53.6%), cited funding to be the major barrier for  
195 conducting research. Non- Governmental Organizations (NGO) stood out to be the  
196 most important source of research funding. Nearly a quarter of the respondents  
197 used personal funds for research while a third of the participants had never applied  
198 for research funding.

199 **Time**

200 Half of the respondents had no time for research due to busy clinical commitments.  
201 A fifth had dedicated research time but majority thought that was not enough.  
202 There was no statistically significant relationship between availability of research  
203 time and whether one worked in a government or private set up, ( $p=0.647$ ).

204 **Knowledge**

205 Respondents were asked to assess their knowledge in three broad areas; research  
206 process, common statistical software and word processing programs.  
207 More than a half reported good knowledge of all stages of the research; however,  
208 statistical skills were poor in a large proportion of participants. Research  
209 knowledge was statistically significantly related to having an additional research  
210 degree ( $p= 0.001$ ). ECSA participants reported significantly better statistical skills

211 than the South African peers ( $p=0.01$ ). SPSS and EpiInfo were the two commonly  
212 known statistical programs, however, majority of the respondents had poor  
213 working knowledge of all the statistical packages.

#### 214 **Research support**

215 Research support was assessed on two areas, general research support given at the  
216 work place and access to electronic resources. Generally, respondents reported  
217 poor research support at their work places, however, research support is better in  
218 academic compared to non-academic institutions ( $p= 0.016$ ) and access to ethical  
219 committees was better in government compared to non-government institutions (  
220  $p=0.000$ ).

221 Though internet was readily available, e resources including HINARI was not  
222 accessible to the majority of the respondents. There were significant differences  
223 between ECCSA countries and South Africa in this area. E resources were more  
224 accessible to South African respondents ( $p=0.045$ ) while HINARI was more  
225 accessible to ECSA respondents ( $p=0.003$ ).

#### 226 **Publication barrier**

227 Majority of the respondents ( 75/108, 69.4%) felt it was difficult for the African  
228 researchers to publish in non-African journals. There was no difference between  
229 the ECSA and South African participants ( $p=0.108$ )

230 **Factors associated with research output**

231 A multivariate analysis was done using the Poisson regression model to determine  
232 the factors associated with research output. “Table 6” summarizes the results.

233 **Table 6 : Factors associated with research output**

| PARAMETER                     | Chi Square | p value | Significance |
|-------------------------------|------------|---------|--------------|
| Academic practice             | 8.77       | 0.003   | S            |
| Clinical practice only        | 2.10       | 0.136   | NS           |
| Administrative position       | 5.12       | 0.024   | S            |
| Years in practice             | 14.76      | 0.000   | S            |
| Private practice              | 14.48      | 0.000   | S            |
| Research involvement          | 47.45      | 0.000   | S            |
| Possession of research degree | 34.31      | 0.000   | S            |
| Interest in research          | 6.27       | 0.012   | S            |
| Process of research knowledge |            |         |              |

|                                    |       |       |    |
|------------------------------------|-------|-------|----|
| Formulating research question      | 0.346 | 0.56  | NS |
| Conducting good literature search  | 4.22  | 0.04  | S  |
| Deciding on study design           | 4.72  | 0.03  | S  |
| Good statistical skills            | 3.29  | 0.07  | NS |
| Academic writing skills            | 3.18  | 0.07  | NS |
| Research support                   |       |       |    |
| Presence of research department    | 43.13 | 0.000 | S  |
| Presence of full time statistician | 87.48 | 0.000 | S  |
| Presence of research assistant     | 0.97  | 0.33  | NS |
| Easy access to IRB                 | 22.62 | 0.000 | S  |
| Research support at work place     | 8.50  | 0.00  | S  |

|                                |       |      |   |
|--------------------------------|-------|------|---|
| Access to electronic resources | 45.94 | 0.00 | S |
| Access to HINARI               | 35.89 | 0.00 | S |

234 S= Factors which are statistically significantly associated with research output

235 NS= Factors which are not statistically significantly associated with research

236 output.

### 237 **Incentives for conducting research**

238 Figure 2 gives a frequency distribution of the incentives that drive the participants

239 to conduct research in the region.

240

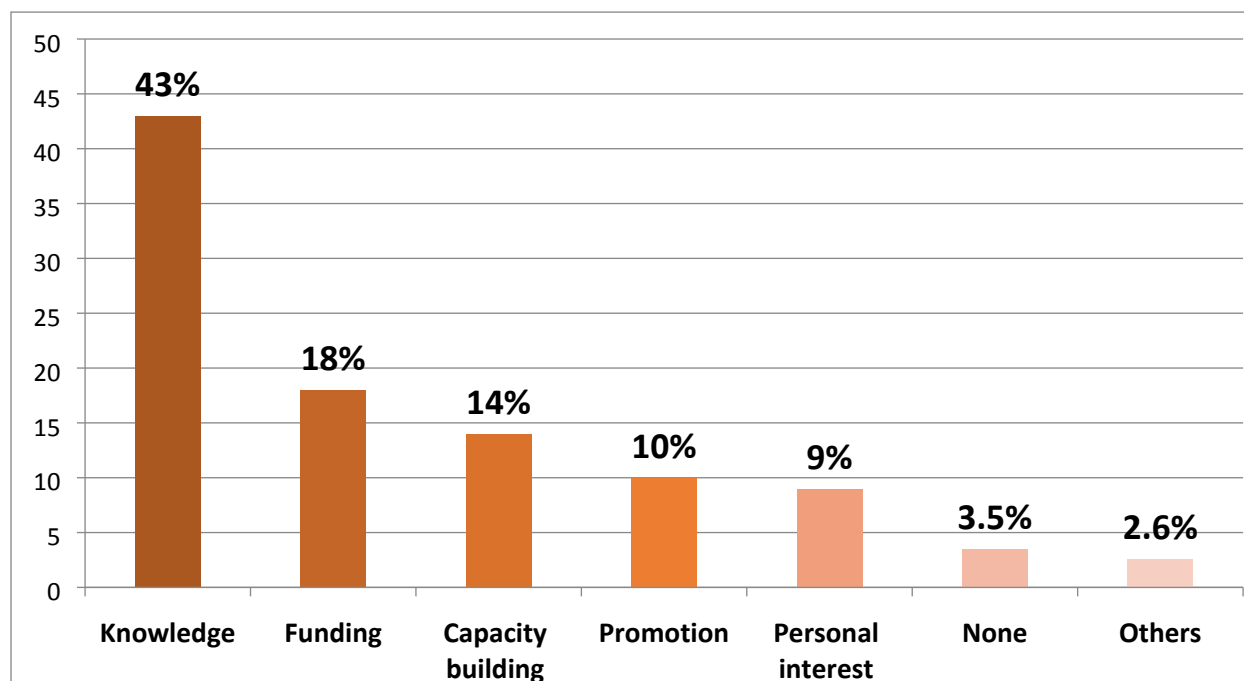

241

242 **Figure 2: Incentives to conduct research**

243 The main incentive to conduct research was to expand the existing knowledge base  
244 in order to provide evidence based management of patients. A small proportion of  
245 respondents felt there were no incentives for conducting research.

## 246 **Discussion**

247 A number of barriers and the associated factors for conducting ophthalmic research  
248 in the regions have been identified. Poor funding, inadequate time for research,  
249 poor research knowledge and departmental support were the prominent barriers.  
250 Research productivity was significantly associated with academic practice,  
251 possession of research degree, research knowledge, research support and access to  
252 electronic resources. Contributing to and expanding the existing knowledge base  
253 was the main incentive for conducting research amongst the ophthalmologists in  
254 the study region. There were no major differences in barriers and incentives  
255 between the ECSA and South African participants.

256 Most of the respondents were involved in research activities and a large majority  
257 was interested in research. The high interest in research amongst the ECSA  
258 ophthalmologist mirrors that of East African Orthopedic surgeons (6) but  
259 strikingly different to the poor research interest amongst the Nigerian  
260 Ophthalmologists (4). The authors of the Nigerian study felt that poor research  
261 interest amongst the Nigerian ophthalmologists is due to funding constraints and



262 inadequate knowledge in research process which feature among the major barriers  
263 for conducting research in Nigeria.

## 264 **Research barriers**

### 265 **Funding**

266 Research funding was one of the main barriers for conducting research. This is  
267 consistent with the findings from Nigeria amongst the ophthalmologists (7) and  
268 medical specialists (8) and East African orthopedic surgeons (6). Personal funds  
269 was the main source of funding for Nigerian ophthalmologists and medical  
270 specialist. Research is an expensive venture and if researchers have to rely on  
271 personal funds for research then this is a great disincentive for conducting good  
272 quality, high impact research which also requires funds for publication. It appears  
273 that African researchers have not yet explored funding partnerships with the  
274 pharmaceutical industry or other corporate sponsors. Standard chartered bank for  
275 example is leading in funding eye care services and training in their novel Seeing  
276 is Believing (SiB) project in collaboration with a number of NGOs like the Fred  
277 Hollows foundation, ORBIS and IAPB (9). African researchers rate government  
278 funding last on the list in spite of WHO recommending and governments endorsing  
279 the 2% health budget dedication to research.

### 280 **Time**

281 Time constraint featured prominently in our study and appears to be a common  
282 barrier across different specialties and regions (Sabzwari et al., 2009, Lloyd et al.,  
283 2004, Brocato and Mavis, 2005). Though it is not practical to separate clinical  
284 practice from research work in Africa, a certain number of hours per week could be  
285 allocated to clinicians for research work. It was expected that ophthalmologists  
286 working in government set ups would have dedicated and perhaps more time for  
287 research compared to those engaged in private practice. This did not show up in  
288 our study.

### 289 **Knowledge**

290 Knowledge of research process was a significant barrier in our study. Statistical  
291 skills appear to challenge a large section of ophthalmologists. Hence, the presence  
292 of a statistician in the department was statistically significantly associated with  
293 increased research productivity. Decision on selecting appropriate study design and  
294 paper writing skills were also a problem though to a lesser extent.

295 Ophthalmologists with additional post graduate training in research had good  
296 knowledge in all the components of research process and higher research  
297 productivity (  $p=0.000$ ). This component does not feature very well in Nigerian  
298 studies, however, it appears to be a major barrier amongst the orthopedic surgeons  
299 in East Africa as well as Asian doctors. This may be an indicator that there is  
300 inadequate training of research process both at the undergraduate and postgraduate

301 level. Research involvement in medical school appears to have a stronger influence  
302 in research productivity (10).

### 303 **Access to academic literature**

304 Majority of the respondents had good internet facilities however most of the  
305 respondents did not have easy access to electronic academic literature and just  
306 about half had access to the Health InterNetwork Access to Research (HINARI)  
307 program. HINARI was initiated by WHO sponsored private –public partnership in  
308 2002 and offers free access to a large collection of prestigious journals to health  
309 institutions in developing countries(11). In spite of this, 48% of the respondents in  
310 our study did not have access to it. This is in contrast to the Nigerian study where  
311 by electronic literature was the main source of scientific information to the  
312 ophthalmologists and HINARI is widely accessible to Nigerian researchers (12). A  
313 study on access to electronic scientific knowledge in selected East and West  
314 African countries found that more than a third of postgraduate doctors relied on  
315 textbooks for information and though internet was generally available, accessibility  
316 varied in private and national institutes. Generally awareness to free online  
317 resources including HINARI was low in West African compared to East African  
318 institutions. HINARI requires Institutional password and not accessible to  
319 individual researchers (13) .

320 **Research incentives**

321 The biggest incentive for conducting research amongst the ophthalmologists in our  
322 study was to increase evidence based knowledge in the region. Another important  
323 incentive in our study was the ready availability of research funding which  
324 contrasts with the idea of actually looking for funding from donors. Research  
325 capacity building and academic promotions also featured as important incentives.  
326 Financial gain, fame and international travel to attend and present research  
327 findings did not feature at all in our study. It appears that ophthalmologists in this  
328 study are fully aware of the fact that research is not a venture for financial growth.  
329 Perhaps, there is also an element of altruism as well. Enhancement of knowledge  
330 was also the greatest incentive for conducting research amongst the Nigerian  
331 ophthalmologist and medical specialists, East African orthopedic surgeons and  
332 Asian doctors. However, financial gains and fame featured quite prominently in the  
333 Nigerian and Asian studies. Capacity building featured as the third most frequent  
334 incentive cited which parallels poor research knowledge as a barrier to research  
335 productivity. Building research capacity by training the local experts in research  
336 process appears to be a single most important factor that will address both barriers  
337 and incentives for research productivity (14).

## 338 **Conclusion**

339 A number of barriers have been identified in this study which appear to hamper  
340 research productivity in Sub-Sahara Africa. Dedicated research time, research  
341 funding and lack of appropriate skills are the main barriers which if addressed will  
342 increase research output in the region.

## 343 **Acknowledgement**

344 We wish to thank sincerely all the Ophthalmologists who took time from their busy  
345 schedules to participate in our study. Special thanks to the following colleagues  
346 who facilitated the study in one way or the other; Dr. Ebrahim Matende, Dr.  
347 Cyprian Ntomoka, Dr. Muchai Gachago, Prof. Trevor Carmichael, Dr. Andrew  
348 Boliter , Dr. Emeritus Chibuga and Josiah Onyango.

## 349 **References**

- 350 1. Courtright P, Faal HB. How can we strengthen ophthalmic research in  
351 Africa? *Can J Ophthalmol.* 2006;41(4):424-5.
- 352 2. Budenz DL, Bandi JR, Barton K, Nolan W, Herndon L, Whiteside-de Vos J,  
353 et al. Blindness and Visual Impairment in an Urban West African Population: The  
354 Tema Eye Survey. *Ophthalmology (Elsevier).* 2012;119(9):1744.

- 355 3. Courtright P, Seneadza A, Mathenge W, Eliah E, Lewallen S. Primary eye  
356 care in sub-Saharan African: do we have the evidence needed to scale up training  
357 and service delivery? *Annals of tropical medicine and parasitology*. 2013.
- 358 4. Mahmoud AO, Ayanniyi AA, Lawal A, Omolase CO, Ologunsua Y,  
359 Samaila E. Ophthalmic research priorities and practices in Nigeria: An assessment  
360 of the views of Nigerian ophthalmologists. *Middle East African journal of*  
361 *ophthalmology*. 2011;18(2):164.
- 362 5. Palmer JJ, Chinanayi F, Gilbert A, Pillay D, Fox S, Jaggernath J, et al.  
363 Mapping human resources for eye health in 21 countries of sub-Saharan Africa:  
364 current progress towards VISION 2020. *Human Resources for Health*.  
365 2014;12(1):1-16.
- 366 6. Elliott IS, Sonshine DB, Akhavan S, Slade Shantz A, Caldwell A, Slade  
367 Shantz J, et al. What factors influence the production of orthopaedic research in  
368 East Africa? A qualitative analysis of interviews. *Clin Orthop Relat Res*.  
369 2015;473(6):2120-30.
- 370 7. Mahmoud AO, Ayanniyi AA, Lawal A, Omolase CO, Ologunsua Y,  
371 Samaila E. Survey of the attitudes of nigerian ophthalmologists to and resources  
372 for ophthalmic research. *Middle East Afr J Ophthalmol*. 2012;19(1):123-8.

- 373 8. Mahmoud AO, Ayanniyi AA, Lawal A, Omolase CO, Ologunsua Y,  
374 Samaila E. Survey of medical specialists on their attitudes to and resources for  
375 health research in Nigeria. *Ann Afr Med.* 2011;10(2):144-9.
- 376 9. Bank SC. Seeing is Believing. <http://www.standardchartered.com/>. 2015.
- 377 10. Lloyd T, Phillips BR, Aber RC, Lloyd T, Phillips BR, Aber RC, et al.  
378 Factors that influence doctors' participation in clinical research. *Medical*  
379 *Education.* 2004;38(8):848.
- 380 11. Aronson B, Aronson B, Aronson B, Aronson B, Aronson B. WHO's Health  
381 InterNetwork Access to Research Initiative (HINARI). *Health Information &*  
382 *Libraries Journal.* 2002;19(3):164.
- 383 12. Anyaoku EN, Anunobi CV, Anyaoku EN, Anunobi CV, Anyaoku EN,  
384 Anunobi CV, et al. Measuring HINARI use in Nigeria through a citation analysis  
385 of Nigerian Journal of Clinical Practice. *Health Information & Libraries Journal.*  
386 2014;31(2):148.
- 387 13. Helen Smith HB, Oscar Mukasa, Paul Snell, Sylvester AdehNsoh, Selemani  
388 Mbuyita, Masanja Honorati, Bright Orji, Paul Garner. Access to electronic health  
389 knowledge in five countries in Africa: a descriptive study. *BMC Health Services*  
390 *Research.* 2007;7(72):7.

391 14. Sawyerr A. African Universities and the Challenge of Research Capacity

392 Development. *Journal of Higher Education in Africa* 2004;2(1):213-42.

393

394
